1 itself – an allocentric frame of reference. Together, they form a distributed network serving to  
2 synchronize the organism’s internal representations to the environment.

3 However, spatial cognition must ultimately be transformed into a motor output. Specific features  
4 of cortico-hippocampal connectivity point to retrosplenial and posterior parietal cortex as  
5 intermediaries in this encoding process. Retrosplenial (RSP) and posterior parietal (PPC)  
6 cortices are interconnected with hippocampus, subiculum, and perirhinal, postrhinal, and  
7 entorhinal cortices<sup>16-24</sup>. These two regions contain neurons representing information in multiple  
8 egocentric and allocentric reference frames<sup>9, 25-33</sup> and boast dense projections to secondary  
9 motor cortex (M2)<sup>34-36</sup>. In turn, M2 projects strongly to primary motor cortex and brainstem and  
10 spinal regions involved in motor control<sup>37,38</sup> and could therefore be a structure important to the  
11 transition of integrated spatial information into action as part of the larger navigational  
12 process<sup>35,39</sup>.

13 M2 has been the subject of much experimental work aimed at determining critical  
14 neurophysiological components of decision-making processes, rule implementation, and action  
15 planning and execution as instructed by single modality sensory cues<sup>40-47</sup>. Anatomically, M2 in  
16 the rat is a subregion of prefrontal cortex that, historically, has been referred to by a number of  
17 different names including: shoulder region, anterolateral motor cortex, medial precentral cortex,  
18 Fr2, medial agranular cortex, premotor cortex, dorsomedial prefrontal cortex, and frontal  
19 orienting field. With respect to navigation, published work indicates that M2 neuron firing predicts  
20 upcoming navigational choices from a single environmental location<sup>41</sup> and that neighboring  
21 prefrontal cortex sub-regions encode information related to rules for navigation as well as  
22 anticipated effort and reward associated with a route<sup>48-62</sup>. Yet, whether M2 neuron firing  
23 dynamics are consistent with a role transitioning a broader and spatially distributed set of  
24 organism-environment spatial relationships into planned actions remains largely an open  
25 question. The answer has critical importance for developing systems neuroscience models of  
26 the navigational process.

27 In the present work, we examined M2 neural activity patterns in the context of a large ‘triple-T’  
28 maze. Rats repeatedly traversed specific routes to and from multiple goal locations. The chosen  
29 environment and task structure spatially and temporally distanced individual actions from  
30 surrounding actions and goal locations. This enabled evaluation of distinctions in firing  
31 associated with action planning versus execution as well as the influence of multiple spatial  
32 variables.

1 We find that M2 neurons most robustly discriminate left versus right turning actions and do so  
2 reliably across all turns. Across M2 neurons, activity differentiating turn type is most often  
3 maximal near the peak of a turn, but, for many neurons, peak firing occurs well before the action  
4 is actually executed. While holding action type constant, M2 neuron populations were also found  
5 to represent multiple spatial and directional features that varied across turn locations. Such  
6 encoding took the form of reliable modulation in the intensity of turn-related spiking activity,  
7 demonstrating that M2 ensembles simultaneously encode current and planned actions as well  
8 as the navigation-relevant context of those actions. M2 neuron firing also varied according to the  
9 presence or absence of choice at a turn, suggesting a more complex role in the action  
10 preparation process than simple categorical left/right choice. Together these findings implicate  
11 M2 as a structure capable of transforming spatial, directional, and decision-making context into  
12 the actions that define navigational behavior.

### 13 **Results**

14 Rats were trained on a triple ‘T’ track maze (Figure 1A) to traverse eight three-turn ‘internal’  
15 routes of the same total length. All eight internal routes shared a single start location but led to  
16 eight different goal locations where food reward (1/2 piece Cheerios cereal) was delivered.  
17 Animals then returned to the start location via the pathways of their choice available along the  
18 maze perimeter. Animals were allowed to move freely in all areas except across the internal  
19 route spaces where backtracking was prevented. Correction was rarely necessary during  
20 recordings as animals were extensively trained to reach a criterion of 80% uninterrupted route  
21 traversals within individual sessions. The animals’ ability to traverse the routes uninterrupted  
22 persisted after surgical implantation of the recording headstage. The rats averaged 64% route  
23 traversals per recording session categorized as smooth, uninterrupted running (Figure 1B).  
24 Henceforth we will refer to these route traversals as “clean” runs. Animals averaged a velocity  
25 of 42cm/s during clean runs. Animals traversed routes according to one of three separate reward  
26 schedules, “high-low”, “visit-all-8”, or “visit-all-4” (see methods section for further detail). In the  
27 analyses to be presented, data from these different reward schedules were pooled.

28 Single unit activity was recorded from 73 left hemisphere and 230 right hemisphere M2 neurons  
29 (303 total) from seven rats recorded under the aforementioned conditions (Supplemental Table  
30 1). Electrode tracks and endpoints are depicted in Figure 1C with example histological data in  
31 Supplemental Figure 1. To avoid biasing assessment of the population distribution of neural  
32 firing responses, all cleanly clustered neurons were included in analyses, regardless of firing

1 rate. As such, the distribution of firing activity found is skewed towards lower rates consistent  
2 with a log normal distribution as described in other cortical regions<sup>63</sup> (Supplemental Figure 2).

### 3 **M2 Robustly Encodes Actions across Contexts**

4 Action encoding is prevalent in M2 across all turn locations and contexts. Firing rate maps of  
5 clean run traversals from three sample neurons are shown in Figure 1D. To quantify these  
6 findings, we defined a turn space around each track turn from 20cm before to 10cm after the  
7 turn apex (Figure 1E). This space was the maximal possible that prevented overlap with adjacent  
8 turn spaces. We required at least 8 clean runs through each grouping analyzed (mean number  
9 of clean runs =  $32 \pm 14$ ). Fifty-seven percent (168/296) of all M2 neurons had significantly different  
10 mean firing rates for the first internal path turn (Figure 1A, turn labeled 1, two-sided Mann-  
11 Whitney U test,  $\alpha < 0.05$ ,  $n = 32 \pm 14$  traversals).

12 In order for an empirically decoded action signal to be actionable, the information must be  
13 accessible to a downstream reader. Consistency in the action code despite variability in the  
14 actions' contexts (e.g., environmental locations) would enable downstream motor cortex to  
15 decode actions without simultaneously decoding context. For example, if a neuron fires strongly  
16 for a specific action at one location, but lower at another, downstream neurons capable of driving  
17 execution of the action effectively receive no information concerning the intended action unless  
18 the animal's location is concurrently transmitted. To truly encode an action itself, there must be  
19 a reliable action-encoding signal that dominates that of concurrent context.

20 Such reliability in encoding of left/right turning action was observed in M2 neuron populations.  
21 Action encoding was extremely consistent across turn locations and contexts as nearly as many  
22 neurons, 51% (154/303) of all M2 neurons, significantly discriminated turn direction even when  
23 the data was pooled across all turn locations (two-sided Mann-Whitney U test,  $\alpha < 0.05$ ,  $n = 32 \pm 11$   
24 traversals, sample sizes matched to first turn sample sizes; 203/303 for two-sided Mann-Whitney  
25 U test  $\alpha < 0.05$ ,  $n = 131 \pm 52$  traversals, full samples). This population value is not significantly  
26 reduced from the single turn discriminability (Figure 1F, chi-squared goodness of fit,  $p = 0.15$ ,  
27  $n = 599$  neurons,  $\chi^2 = 2.12$ , d.f.=1, odds ratio=0.79). The M2 neural population as a whole showed  
28 no laterality preference for brain hemisphere with turn encoding neurons displaying higher mean  
29 firing rates equally for ipsilateral and contralateral turns, respectively (102 contralateral preferring  
30 neurons of 203 significant turn-encoding neurons, chi-squared goodness of fit to binomial  
31 distribution,  $p = 0.94$ ,  $n = 203$  neurons,  $\chi^2 = 0.005$ , d.f.=1, odds ratio=0.99).

1 To assess the quality of M2 neurons' turn discrimination, we adopted *choice probability*<sup>64,65</sup> as a  
2 measure of effect size. Choice probability (CP) is simply the probability that an observer can  
3 correctly identify an outcome given a single sample from one of two distributions. It is equivalent  
4 to the area under the curve of the receiver operator characteristic<sup>66,67</sup>. Due to the structure of  
5 our maze and the task, sample sizes varied widely across turn locations. This measure is  
6 invariant to sample size and therefore is a particularly useful method for comparing our results.

7 CP confirms that M2 neurons' encoding of turn directions is both widespread and reliable. To  
8 summarize population discrimination quality, we have adopted easily interpretable CP  
9 benchmarks of two-thirds (66%) for general discrimination and 90% for a high discrimination  
10 threshold. The second and third example neurons shown in Figure 1D-E have CP near these  
11 thresholds as examples of the average firing that leads to these levels of discrimination. On  
12 average, over half (54%) of the M2 neurons have CP exceeding 66% at any given left/right turn  
13 location, including 14% of neurons classifying at a rate exceeding 90% (Figure 1G). This is  
14 significantly higher than the CP of the same neurons with a random shuffling of turn direction  
15 identities (two-sided Kolmogorov-Smirnov test,  $p < 0.0001$   $n = 606$   $D = 0.82$ ). No neuron in the  
16 shuffled distribution discriminates above 66% (Figure 1G, max 60%). There is also no significant  
17 contextual effect elevating or suppressing turn discriminability at certain locations as all locations  
18 show statistically indistinguishable distributions of CP for left versus right turning (Figure 1H,  
19 two-sided Kruskal-Wallis test,  $p = 0.115$ ,  $\chi^2 = 10.24$ ,  $d.f. = 6$ ).

20 For turn discrimination information to be accessible to downstream neurons without also passing  
21 on context, the turn choice must be encoded the same regardless of any other variable. To  
22 assess this, we pooled individual neurons' data across all turn locations. The CP remain  
23 comparable to the location specific values, with the population counts of neurons exceeding the  
24 66% and 90% benchmarks of discriminability only dropping from 54% to 45% and from 14% to  
25 11% of the population, respectively (Figure 1GI).

## 26 **The Time Course of M2 Action Discrimination Involves Planning and Execution**

27 To further delve into the time course of action discrimination we applied the CP method to each  
28 1cm bin surrounding the first internal turn (Figure 1A, turn labeled 1). This particular 'T'  
29 intersection has a long approach straightaway before the turn and allows for an extended  
30 examination into left/right action discrimination. A space from 40cm before the turn apex to 15cm  
31 afterwards was analyzed.

1 M2 as a whole discriminates the upcoming action and continues to discriminate through action  
2 execution. M2 neuron sub-populations have peak CP values throughout the investigated epoch  
3 (Figure 2A), and a minimum of 15% of the M2 neuron population significantly differentiates the  
4 turn outcome at each time point (Figure 2B). This number increases and peaks at the turn apex  
5 with over 50% of individual M2 neurons significantly discriminating the action. The count then  
6 decreases through the end of the turn. The high reliability (>90% discrimination) neural  
7 population followed this same pattern with neuron counts ramping to the turn apex and  
8 decreasing afterwards.

9 M2 planning and action execution could either be carried out by the same neurons representing  
10 the entire period or many neurons representing the action at specific times with respect to the  
11 action. In spite of the complete temporal coverage as a population, CP values for individual  
12 neurons do not stay high for the entire period. Instead, peak CP values typically extend for a  
13 limited span of less than 20cm for any given neuron (Figure 2C) and the locations of the peak  
14 CP values vary. Given this pattern, many neurons discriminate most accurately well before the  
15 turn apex and do not significantly discriminate actions at the peak of the turn (Figure 1E middle).  
16 M2 thus contains discriminating neurons spread throughout the time sequence of planning and  
17 executing an action, and reliable discrimination through time requires an evolving ensemble of  
18 neurons.

### 19 **Widespread Representations of Spatial Context in M2**

20 While action encoding in M2 neuron populations is clearly strong and reliable irrespective of turn  
21 location, differences between turn contexts hint that action outcome is not the sole variable  
22 represented in M2 neural activity during navigation. Considering the extensive reciprocal  
23 connectivity between M2 and both PPC and RSP, two associative cortices bearing significant  
24 spatial modulation in firing, we reasoned that M2 neurons could be integrating multiple spatial  
25 features of the environmental context in generating action-specific firing. To examine this  
26 possibility, four navigationally-relevant spatial features were tested for their impact on M2 turn-  
27 related activity – environmental/allocentric location, orientation, route being traversed, and  
28 progression within a route (1st, 2nd, or 3rd turn). Each of these variables is known to have a  
29 strong impact on the RSP, PPC or both<sup>9, 26, 28, 33</sup>.

30 To assess the impact of context (e.g., the effect of place on turn-related firing), we controlled for  
31 action (left/right turn) by calculating CP for like actions (e.g., left turns versus left turns). For  
32 some contextual variables, more than two conditions needed to be examined for discriminability.

1 Therefore, we applied pairwise CP tests for each combination of distributions (e.g., left turn  
2 associated firing rates for each turn location against each other turn location). We present  
3 minimum, mean, and maximum CP values from these comparisons to aid in the comprehension  
4 and comparison due to the necessary differences in analyses.

5 Encoding of all four spatial features is widespread but with less impact on M2 activity than left  
6 versus right turning action (Figure 3A). The distributions of CP for the spatial factors in M2 are  
7 all significantly higher than chance but significantly lower than the pooled action discrimination  
8 (one-sided Kolmogorov-Smirnov test,  $p < 0.0001$ ,  $n = 606$ ,  $D > 0.16$  for all tests). The variability  
9 within individual pairwise tests can also be examined. While minimum CP for contextual  
10 variables are closer to values obtained for randomized data, minimum CP for action remain far  
11 greater than chance. Maximum CP for contextual variables are far above chance levels for the  
12 full population, but, even taking this perspective, many more neurons exhibit high CP for action  
13 discrimination. In fact, nearly no neurons reach our high discrimination threshold for any of the  
14 spatial context variables (Figure 3B). These results indicate that as a whole, M2 neuron sub-  
15 populations do accurately encode spatial and directional information, but that encoding of action  
16 (turn type) is much stronger.

17 Given the widespread occurrence of different forms of spatial and directional information, we  
18 considered that the distribution of types of information and its co-occurrence with action  
19 discrimination may be important. Correlations of neurons' CP across factors is shown in Figure  
20 3C. Correlations between action encoding and each spatial factor are positive but relatively  
21 weak. The same is true for correlations between spatial factors except for the correlation  
22 between progress and orientation, which is quite high. This means that neurons that robustly  
23 encode action also tend to be neurons that encode context. Position rate maps of the routes  
24 taken are shown for an example neuron highlighting examples of conjunctive encoding in Figure  
25 3D. Figure 3E shows the calculated mean CP for each neuron and Figure 3F highlights the mean  
26 individual firing rate vectors and separation of activity rates for different conditions. These  
27 neurons are typical examples of neurons with complex firing patterns that encode multiple  
28 factors to varying degrees.

### 29 **A Widespread but Limited Effect of Choice in M2 Action Representations**

30 Previous work has considered a role for M2 in orienting decisions<sup>39-44</sup>. If the primary function of  
31 this region lies in decision-making as opposed to action planning and execution, the ability to  
32 discriminate left versus right turning action may disappear at locations where no left versus right

1 choice exists. In our navigational task, some turns are forced (no alternative path, 'L') while  
2 others demand choice ('T'). Therefore, we grouped all turn locations based on action (left or right  
3 turn) and choice context (forced vs choice). We then evaluated action discrimination at choice  
4 locations and forced-turn locations separately. There is no apparent effect on action  
5 discrimination CP due to choice context (Figure 4A). The CP distributions for forced and choice  
6 contexts did not significantly differ from each other nor from the pooled CP distribution (two-  
7 sided Kolmogorov-Smirnov test,  $p > 0.27$   $n = 606$   $D < 0.09$  for all tests). This result is inconsistent  
8 with lower action discrimination during forced-turn contexts and casts doubt on decision-making  
9 as the primary function of the region. Instead, the current data are consistent with M2 as a signal  
10 for upcoming and current actions.

11 Although action discrimination does not depend on there being a choice at all, the M2 population  
12 does discriminate between forced and choice contexts for the same action. The discriminability  
13 is similar to that of spatial factors (Figure 4BC). The position rate maps for an example action  
14 discriminating neuron with very strong modulation by choice context is highlighted in Figure 4DE.  
15 This neuron has high CP for left versus right action (higher activity for left turns) and, at the same  
16 time, fires more strongly for both left and right turns when those turns occur at locations where  
17 a left or right turn could be made (Figure 4F).

## 18 **Discussion**

19 Prior work has considered, in detail, the firing correlates of M2 neurons to actions, action  
20 planning, and sensory integration in two-alternative, forced-choice settings<sup>39-44</sup>. In the present  
21 work, the task design and maze structure enabled us, for the first time, to consider these  
22 previously-identified M2 neuron correlates as they relate to the problem of navigation and  
23 integration of multiple complex spatial relationships between organisms and their  
24 environments. The ability of animals to execute fast, uninterrupted traversals of the eight  
25 internal and two external routes under these circumstances enabled us to examine a  
26 hypothesized role of M2 in the transformation of spatial cognition into action during navigation.  
27 M2 ensemble activity consistently encoded the left versus right turning action of the animal in a  
28 manner largely independent of the spatial context of any given turn site and independent of  
29 whether a choice among actions was demanded. However, action-discriminating activity itself  
30 was significantly modulated in magnitude by multiple spatial and directional variables informing  
31 turn choice at any given maze intersection. The results complement recent work outside the  
32 realm of navigation that have examined this dorsolateral prefrontal cortex sub-region and its



1 PPC inputs as they relate to decision-making and point to the M2 as a key structure in  
2 translating more complex forms of spatial knowledge into action.

3 Large sub-populations of M2 neurons exhibited strong discrimination of left versus right turn  
4 actions and, in largest part, did so irrespective of spatial context given by several variables  
5 including turn location, the specific route chosen, heading direction, and route progress (i.e.,  
6 turn number in a series associated with a particular route). The strength of action tuning was  
7 much higher than that for spatial and directional variables even when taking into account the  
8 larger number of possible variable states. That is, even when focusing in on the most  
9 prominent pairwise rate distinctions according to a variable such as turn location, rate  
10 distinctions for left versus right turns remain stronger across the M2 population.

11 By providing ample space and time between the execution of different turns and by analyzing  
12 only uninterrupted route traversals, we were also able to assess whether M2 activity dynamics  
13 are more consistent with encoding of current and planned action as opposed to a categorical  
14 decision-making process. In a decision-making process, one would expect essentially all  
15 neurons discriminating action to exhibit synchronous ramping of discriminatory activity prior to  
16 the action execution. As a population, discriminatory activity in M2 does ramp to a peak near  
17 the point of maximal angular velocity. However, locations of peak discrimination points across  
18 individual neurons varied widely in their proximity to the turn apex. For many neurons, peak  
19 discrimination of turn type not only preceded the turn apex, but also failed to discriminate turn  
20 type at the apex itself. Thus, in the context of navigation, M2 dynamics are more consistent  
21 with encoding transitions between action planning and execution rather than a deliberative  
22 process. The equal strength of predictive tuning at turn sites devoid of a decision (forced left or  
23 right) provides a second argument in favor of a relatively pure action planning and action  
24 execution role. An integrated process transitioning action plans to execution would have  
25 obvious utility in generating the fluid transitions between actions in a sequence that compose  
26 the animals' fast, uninterrupted trajectories in the present task. Notably, disruptions in the  
27 learning of actions as part of a sequence are found subsequent to M2 lesions<sup>68</sup>. In this role, M2  
28 may drive actions directly through corticospinal efferents<sup>38</sup> or indirectly through intermediary  
29 structures such as primary motor cortex<sup>37,52,69-71</sup>. Recent data suggest that interactions  
30 between M2, primary motor cortex, ventromedial thalamus, and cerebellum may also play a  
31 key role<sup>69-74</sup>.

1 While action discrimination was found to be relatively context free, spatial and directional  
2 context significantly modulate activity rates for any single turn type. By separately examining  
3 the activity vectors surrounding all left turns and all right turns, we found that the location and  
4 directional heading of a turn relative to the full environmental space were both strong factors  
5 modulating the intensity of turn-related activity. Both the specific route taken by the animal and  
6 the position of a turn site within that route were also potent in modulating turn-related activity.  
7 The status of a turn site as ‘forced’ (only one turn type possible) versus choice (left or right turn  
8 available) proved a smaller, but not insignificant, contextual factor in modulation of M2 firing.

9 PPC and RSC are both major sources of afferents to the M2 sub-region of prefrontal cortex<sup>34-36</sup>  
10 and have been studied extensively with respect to the forms by which they map the spatial  
11 location and directional orientation of the animal relative to the environment. PPC neurons  
12 robustly encode the location of the animal within a route space irrespective of the location of  
13 the route in the larger space of the environment<sup>9</sup>. Such encoding is not epiphenomenal to the  
14 tendency for a minority of PPC neurons to map specific turn types<sup>9,27,75</sup>. Instead, turn type  
15 specific firing for this minority population of PPC neurons is strongly modulated by the location  
16 of a turn in the environment or within a sequence<sup>9,25,75</sup> such that PPC generates distinct  
17 ensemble patterns for all route locations<sup>9,35</sup>. While some RSC neurons generate similar spatial  
18 firing patterns for a single route placed in different regions of the larger environment, RSC  
19 ensembles generate distinct firing patterns for the same route in two different locations<sup>28,31</sup>.  
20 Together then, RSC and PPC together provide complementary information concerning position  
21 in a route and position in the environment. Both structures also contain small populations of  
22 head direction cells<sup>26,28,76,77</sup> and discrimination of two routes taken through the same location  
23 has been reported for both PPC and RSC ensembles<sup>33,78</sup>. Thus, PPC and RSC stand as two  
24 likely sources of modulation of M2 neurons according to the environmental location of a turn,  
25 the environment-referenced set of head orientations of the animal as it proceeds through a  
26 turn, the shape of the full route taken by the animal, and the ordering of turns within a route.

27 Our use of CP analysis to characterize tuning of M2 neurons to left/right turning actions and to  
28 spatial and orientational variables leads us to conclude that both actions and the context in  
29 which they occur are encoded in M2 populations. This raises the question of whether M2  
30 functions to encode the context of actions, encodes only upcoming and current actions, or  
31 both. Here, distinct differences in the strength of encoding of different variables perhaps offers  
32 an answer. Under essentially all circumstances, modulation of single neuron and ensemble

1 activity rates distinguishing actions is clearly greater than that for the spatial and choice  
2 variables considered. Given this circumstance, a downstream target that can directly mediate  
3 actions could, through degeneration, produce the same activity patterns related to left or right  
4 turning in response to largely overlapping input patterns for different spatial contexts. In this  
5 way, a pure action signal could be derived despite the variability in patterning of M2 neurons  
6 according to spatial context. A second way to accomplish the same outcome, one that cannot  
7 be addressed here, is through specificity of projections. M2 neurons that strongly discriminate  
8 left/right turning actions without discriminating context could be biased in their efferent  
9 connectivity. An argument against this model is that tuning for action and spatial context in M2  
10 is positively correlated. Nevertheless, recent work<sup>79</sup> does show that M2 populations segregate  
11 in lateralization of their action tuning according to whether they project intracortically or to  
12 brainstem targets. Projection specificity of M2 neurons with context-independent encoding of  
13 action will be a question of importance in future work aimed at determining how M2 signals are  
14 interpreted by its efferent targets.

15 M2 efferents reach many brain regions and so one feature of M2 function could be to supply a  
16 conjunctive efference-copy that reflects the full context of actions and the spatial and choice  
17 context in which they occur. Action tuning observed in RSC and PPC, for example, could  
18 reflect the efferents of M2 neurons to these regions. We conclude, however, that M2's role is  
19 best understood as a part of a sensory and spatial associative cortex network that outputs  
20 preparatory motor actions. This view aligns closely with that posited in prior work emphasizing  
21 experiments wherein spatial context was not considered and emphasizes M2's situated place  
22 in the PPC and RSP cortical network. In this respect, it follows that M2 tuning to spatial context  
23 may be a remnant of an integration process in which spatial information is transformed into an  
24 appropriate motor plan.

25 We conclude that M2 ensemble activity discriminates, in a manner largely independent of  
26 spatial context, the specific motor acts associated with navigation constrained to paths. We  
27 also conclude that such activity can contribute to both the planning and execution of action.  
28 The implication of M2 in contributing to action planning in navigation is consistent with prior  
29 work emphasizing the role of this particular sub-region of prefrontal cortex in generating activity  
30 patterns predictive of upcoming choices during delay periods preceding a single choice point<sup>41</sup>.  
31 It is also consistent with work demonstrating that M2 is required for action planning<sup>73</sup> cued by  
32 single modality sensory cues of multiple types<sup>80</sup>. The present work demonstrates that such

1 activity is distributed across a broad expanse of space and time prior to peak turning behavior  
2 and can therefore manifest as a continuous process during active and uninterrupted navigation  
3 through a series of left/right turn choices. This distinguishes the present finding from prior work  
4 examining M2 activity during delay periods absent locomotion<sup>41</sup> and, furthermore, dissociates  
5 action type from reward location as the relevant variable predicted by M2 during delay periods  
6 of navigation tasks. Finally, the ramping of discriminatory activity to a peak at the height of  
7 turns is suggestive of a network process internal to M2 that continually mediates transitions  
8 from planned to executed actions.

## 9 **Materials and Methods**

### 10 **Subjects**

11 Subjects were 7 adult male Sprague-Dawley rats. From these rats, a total of 303 neurons were  
12 recorded (73 left, 230 right; for per animal counts, see Supplemental Table 1). Rats were housed  
13 individually and kept on a 12-h light/dark cycle. Prior to experimentation, animals were  
14 habituated to the colony room and handled for 1–2 weeks. During training and experimentation,  
15 rats were food-restricted with weights maintained at 85–95% of their free-feeding weight. Water  
16 was available continuously. Rats were required to reach a minimum weight of 350g (5–10  
17 months of age) before surgery and subsequent experimentation. All experimental protocols  
18 adhered to AALAC guidelines and were approved by the IACUCs through either the UCSD  
19 Animal Care Program or the Scripps Research Institute.

### 20 **Apparatus**

21 Behavioral tasks were conducted using a ‘triple-T’ track maze. The track (Figure 1A, left panel;  
22 8-cm-wide pathways, overall 1.6m × 1.25m in length and width, painted black) stood 20cm high  
23 in the middle of a large recording room. The track edges were only 2cm in height, allowing an  
24 unobstructed view of the environment’s boundaries and associated distal visual cues.

### 25 **Behavior**

26 Rats were habituated to the ‘triple-T’ maze during two 30-minute periods of free exploration.  
27 Animals were then trained to run in an uninterrupted fashion from the start location to one of  
28 eight potential goal sites distributed near the perimeter of the full maze (Figure 1A, yellow lines).  
29 These eight ‘internal’ routes consisted of straight sections interleaved with three left or right turns  
30 prior to a full stop at a goal location. The animal must then travel along the perimeter of the maze  
31 to the start location to begin a new trial. The ‘perimeter’ routes selected were typically those

1 yielding the shortest distance to the start site. Internal route lengths were 140cm in total length,  
2 with turns at 51cm, 87cm and 118cm. Perimeter routes varied considerably in length according  
3 to the distances between goal locations and the start site. If warranted, reward (a half piece of  
4 Cheerios cereal) was made available at the goal sites. Over 1–2 weeks, animals were trained  
5 by approximation to make route traversals between goal sites. Over at least two additional  
6 weeks, animals were trained by simple trial and error to a criterion of 80% ballistic (uninterrupted)  
7 route traversals. Animals were surgically implanted only after this level of task performance had  
8 been achieved.

## 9 **Reward Schedules**

10 Multiple reward schedules were used across the set of animals. For the visit-all-8 reward  
11 paradigm, the animal was rewarded at all eight goal locations, but needed to visit all locations  
12 before rewards were reset at all reward locations. For the visit-all-4 reward paradigm, only the  
13 far four routes and reward locations were included. For these animals, the other four routes were  
14 blocked and the animals never had access to those goal sites. In the high-low reward paradigm,  
15 two locations out of the eight were randomly chosen to be rewarded for each recording. One  
16 location contained one half Cheerio reward and the other one quarter. After 20 minutes, two  
17 more randomly selected locations were chosen to be rewarded in the same high-low fashion  
18 and the recording continued for 20 more minutes. Under the high-low paradigm, rats primarily  
19 visited the high-reward locations, effectively limiting sampling to three internal routes.

## 20 **Surgery**

21 Rats were surgically implanted with stereotrode or tetrode arrays (twisted sets of two 25 $\mu$ m  
22 tungsten wires or four 12.5 $\mu$ m nichrome wires) inserted into custom-built microdrives (four to  
23 eight arrays per microdrive). Rats were implanted unilaterally or bilaterally with one microdrive  
24 per hemisphere into M2. Rats were anesthetized with isoflurane and positioned in a stereotaxic  
25 device (Kopf Instruments). Following craniotomy and resection of dura mater, microdrives were  
26 implanted relative to bregma, centered at (A/P 2.5mm, M/L  $\pm$ 1.2mm, D/V -0.5mm).

## 27 **Recordings**

28 After a one-week recovery from surgery, animals were retrained for at least one week before  
29 beginning recordings. This was to ensure adequate behavior and running ability with the new  
30 weight of the implant. All recordings were from animals that were well trained on the task.  
31 Electrodes were moved ventrally in 40-80  $\mu$ m increments between recordings to maximize the  
32 number of distinct units collected. Omnetics connectors were connected to the microdrives for

1 all animals. One of two recording systems was used for data collection. In one, utilized for five  
2 animals, each Omnetics connector was connected to a single amplifying headstage (1X gain,  
3 NB Labs). A tether led to a bank of amplifiers (Lynx-8, Neurolynx) and then fed into an acquisition  
4 computer running the AD system (courtesy of Loren Frank and Matt Wilson, MIT). Signals were  
5 filtered at 0.6 to 6kHz, amplified between 1,000 to 20,000X, and digitized at 32kHz. For the other  
6 two animals, each microdrive had two electrical interface boards connected to a single amplifying  
7 headstage (20X, Triangle Biosystems). A tether led to a set of preamplifiers (50X) and a high  
8 pass filter (>150Hz). Signals then fed into the acquisition computer running Plexon SortClient  
9 software and were filtered at 0.45–9kHz, further amplified 1–15X, and digitized at 40kHz. Total  
10 amplification regardless of system was a total of 1,000–20,000X). Single unit action potential  
11 waveforms were isolated in either XClust (courtesy of Loren Frank and Matt Wilson, MIT) or  
12 Plexon OfflineSorter software. Waveform parameters used were peak height, peak valley,  
13 energy, and principal components. Waveform clusters appearing to overlap with the amplitude  
14 threshold set for collection were discarded to avoid collection of neurons with partial spiking data.  
15 Waveform amplitudes were monitored to ensure systematic fluctuation over time did not produce  
16 confounds in isolating single units. Recordings lasted approximately 30-60 minutes. No neurons  
17 were excluded from analysis, even if activity was minimal.

## 18 **Position Tracking**

19 Animal position was tracked using a camera attached to the ceiling above the recording room  
20 floor. Either Dragon Tracker hardware (AD recording system) or Plexon's CinePlex Studio  
21 software was used to detect LED lights fitted to the animal's surgical implant before each  
22 recording. Light positions were captured at 60Hz. Accurately identifying and defining the actions  
23 of a freely navigating animal for analysis can be difficult due to the wide variation of movements.  
24 To control for such variation in analyzing action potential firing rates, we filtered the animal  
25 tracking data for smooth, uninterrupted traversals of entire routes. This procedure permitted us  
26 to examine action potential firing rate data associated with stereotypical movements (forward  
27 running, turning) through all sections of all routes. The defined routes were the eight internal  
28 routes toward potential reward sites or perimeter routes leading to the internal entrance (Figure  
29 1B). As perimeter routes from the four goal locations nearest the start point were excessively  
30 short, the perimeter routes used for analysis were the two two-turn routes returning the animal  
31 from the first four internal route end-points to the start point. Each clean run was linearized by  
32 mapping tracking locations to the nearest 1cm bin of a template of the traversed routes.

## 1 **Histology**

2 Animals were perfused with 4% paraformaldehyde under deep anesthesia. Brains were removed  
3 and sliced into 50 $\mu$ m sections and Nissl-stained to reveal the final depth of electrode wires in  
4 M2. Microdrive depth monitored across recordings and final electrode depth as observed in  
5 histology were compatible in all animals reported and a schematic of fiber tracks is shown in  
6 Figure 1C.

## 7 **Identification of Fluid, Efficient Route Traversals**

8 To identify uninterrupted runs for individual routes, a multistep process using custom MATLAB  
9 graphical user interfaces was used. First, a user defines starting and ending gates for each route.  
10 Then the program finds all runs crossing these locations with sustained running speeds of 3cm/s  
11 or greater throughout. Finally, a researcher uses the interface to verify that all such identified  
12 runs did not contain either obvious interruptions in locomotion or significant alterations from the  
13 stereotyped path seen across multiple runs. The results of this process can be seen in Figure  
14 1B. By this method, stalled track traversals, reward periods, and other position data captured  
15 between runs are not conflated with data with controlled action and spatial values.

## 16 **Positional Firing Rate Maps**

17 To characterize the firing activity of the M2 neurons, we calculated individual neurons' positional  
18 firing rates by dividing the total number of spikes of each neuron at each location by the total  
19 occupancy time at each location. Only position samples included in identified ballistic route  
20 traversals were used in such calculations and rate vectors for each route were generated  
21 separately. Positional firing maps were smoothed using a 2D convolution with a Gaussian filter  
22 with a standard deviation of 2cm that also accounts for bins with no occupancy<sup>81</sup>.

23 For each recording, custom MATLAB software is utilized to generate a spatial template matching  
24 the average trajectory of the animal along each route in the horizontal (2D) plane. This approach  
25 ensures the best possible matching of animal behavior and positions taken across recordings  
26 and trials. The beginnings and ends of each straight run and turn peaks are marked and equally  
27 sized bins are interpolated between marked locations. After establishing the template, each  
28 tracking position sample is mapped to the nearest template bin. Firing rates for each bin of each  
29 route are calculated by summing the number of spikes in each template bin and dividing by the  
30 total amount of time the bin was occupied. Mean firing rates are calculated by summing mean  
31 rates at each location and dividing by the number of runs.

## 1 **Peri-event Mean Firing Rates**

2 Peri-event mean firing rates were used to calculate choice probabilities at turns. For the defined  
3 linear space surrounding positions peak turning behavior occurs, firing rates for all occupied bins  
4 of linearized positional rate vectors were averaged for each trial. Bin sizes were 1cm and the  
5 length of the pre-turn and post-turn spaces were 20cm and 10cm respectively. This approach  
6 allowed us to make direct comparisons of activity rates for all pre-turn and post-turn spaces  
7 across turn types (left versus right) and for the same turn type at different maze locations.

## 8 **Choice Probability**

9 Choice probability (CP) is a metric coined by Britten et al.<sup>64</sup> It is the probability that an observer  
10 can correctly identify an outcome given a single sample from one of two distributions. It is  
11 equivalent to the area under the curve of the receiver operator characteristic<sup>66-67</sup>. It can be  
12 calculated from the U statistic of the Mann Whitney U test of two distributions,

13 
$$choice\ probability_{U_1} = \frac{U_1}{n_1 n_2}$$

14 where  $n_1$  and  $n_2$  are the number of samples in distributions 1 and 2, respectively. The difference  
15 of the value of this metric from chance (50%) is symmetric but depends on the order of the  
16 magnitudes of the medians of the two distributions. For our purposes, the higher magnitude of  
17 the distributions was not important, only the separation. Because of this, the maximum choice  
18 probability,

19 
$$choice\ probability = \max\{choice\ probability_{U_1}, choice\ probability_{U_2}\},$$

20 was always selected.

21 For all peri-event action choice probabilities (based on spike rates for left versus right turns),  
22 peri-event mean firing rates were calculated from the distributions of routes with left and right  
23 actions. For the time course analysis, choice probabilities were computed from firing rates of a  
24 particular bin instead of mean values across bins. To control for the effect of noisier data at this  
25 fine granularity and multiple comparisons, the significance level for the time course test was  
26 established by a bootstrapping procedure. We shuffled the left/right action identities of the same  
27 runs analyzed for each bin and neuron to create 1000 shuffled left/right datasets for each bin  
28 and for each neuron. Choice probabilities from this shuffled distribution were calculated and used  
29 to establish a  $p < 0.05\%$  criterion for choice probability values.



1 For contextual choice probabilities (e.g., the effect of place on turn-related firing), we always  
2 controlled for action (left/right turn) by comparing only like actions (e.g., left turns versus left  
3 turns). For many contextual factors, more than two conditions needed to be examined for  
4 discriminability. To preserve the ease of interpretation, we decided upon pairwise choice  
5 probability calculations for each combination of distributions. For progress within a route, this  
6 consisted of 12 comparisons: 1st, 2nd, and 3rd turns of the 8 internal routes. For location, we  
7 controlled for route progress and therefore had up to 26 comparisons: between four 3rd turn  
8 locations (6 combinations), and between two 2nd turn locations (1 combination) for each of left  
9 and right turns. For route, we controlled for location and progress by analyzing only the 1st turn  
10 common to all 8 internal paths. We therefore had 12 comparisons: 6 from four left routes and 6  
11 from 4 right routes. For orientation we had 12 comparisons as there were four possible  
12 trajectories for lefts and rights (north-going to west-going, north to east, south to west, south to  
13 east). Finally, for choice, we only had two comparisons, forced versus choice, for lefts and rights  
14 that occurred at locations where the animal could or could not execute more than one type of  
15 turn. We present minimum, mean, and maximum values from these comparisons to aid in the  
16 comprehension and comparison due to the necessary differences in analyses.

### 17 **Statistical tests**

18 Nonparametric tests were used throughout to avoid assumptions of normality in the data. The  
19 Mann Whitney U test was used to evaluate the statistical significance of peri-event mean firing  
20 rates between left and right actions. Fisher's exact test was used to assess the quantities of  
21 significant neurons for the first turn alone (common to all 8 internal paths) and for all turns pooled  
22 (all internal and perimeter turns). A Chi-Squared Goodness of Fit test against an unbiased  
23 binomial distribution was used to assess deviation from chance (50%) for laterality preference  
24 of M2 neurons. The Kruskal-Wallis test was utilized to evaluate whether action choice  
25 probabilities from separate locations were from different distributions. The Kolmogorov-Smirnov  
26 test was used to assess if pairwise distributions were significantly different for CP distributions.  
27 No statistical methods were used to predetermine sample sizes. However, based on similar  
28 sample sizes reported in previous publications, we believe we have adequate power (0.8) or  
29 greater to detect significant effects.

### 30 **Data and code availability**

31 The data that support the findings of this study and code used for analysis are available from  
32 the corresponding author upon reasonable request.

1 **Acknowledgements**

2 This work was supported by the National Science Foundation (IOS-1149718).

3 The authors wish to thank the following people for technical assistance, discussion of the data,  
4 and editing of the original manuscript: Kara Papaefthimiou, Ari Kappel, Belinda La, Cody  
5 Walters, Emily Pham, Jinho Chung, Natalie Tongprasearth, Emily Tao, Scott Ragland, Eran  
6 Mukamel, Laleh Quinn, Lara Rangel, Andrea Chiba, Andrew Alexander, Laura Shelley, and Alex  
7 Johnson.

8 The authors declare no competing financial interest.

## References

1. Bassett JP, Taube JS. (2001) Neural correlates for angular head velocity in the rat dorsal tegmental nucleus. *J Neurosci.* 21(15):5740-51.
2. Wang C, Chen X, Lee H, Deshmukh SS, Yoganarasimha D, Savelli F, Knierim JJ (2018) Egocentric coding of external items in the lateral entorhinal cortex. *Science* 23;362(6417):945-949.
3. LaChance PA, Todd TP, Taube JS (2019) A sense of space in postrhinal cortex. *Science* 365(6449).
4. Dale A, Cullen KE (2019) The Ventral Posterior Lateral Thalamus Preferentially Encodes Externally Applied Versus Active Movement: Implications for Self-Motion Perception. *Cereb Cortex* 29(1):305-318
5. Hinman JR, Chapman GW, Hasselmo ME (2019) Neuronal representation of environmental boundaries in egocentric coordinates. *Nat Commun.* 10(1):2772
6. O'Keefe J, Dostrovsky J. (1971) The hippocampus as a spatial map. Preliminary evidence from unit activity in the freely-moving rat. *Brain Res.* 34(1):171-5.
7. Taube JS, Muller RU, Ranck JB Jr. (1990) Head-direction cells recorded from the postsubiculum in freely moving rats. I. Description and quantitative analysis. *J Neurosci.*10(2):420-35.
8. Hafting T, Fyhn M, Molden S, Moser MB, Moser EI (2005) Microstructure of a spatial map in the entorhinal cortex. *Nature* 436(7052):801-6.
9. Nitz DA. (2006) Tracking route progression in the posterior parietal cortex. *Neuron.* 2006 49(5):747-56.
10. Savelli F, Yoganarasimha D, Knierim JJ. (2008) Influence of boundary removal on the spatial representations of the medial entorhinal cortex. *Hippocampus.* 18(12):1270-82
11. Stewart S, Jeewajee A, Wills TJ, Burgess N, Lever C. (2013) Boundary coding in the rat subiculum. *Philos Trans R Soc Lond B Biol Sci.* 369(1635).
12. Olson JM, Tongprasearth K, Nitz DA (2017) Subiculum neurons map the current axis of travel. *Nat Neurosci.* 2017 20(2):170-172.
13. Bos JJ, Vinck M, van Mourik-Donga LA, Jackson JC, Witter MP, Pennartz CMA (2017) Perirhinal firing patterns are sustained across large spatial segments of the task environment. *Nat Commun.* 8:15602
14. Peyrache A, Schieferstein N, Buzsáki G (2017) Transformation of the head-direction signal into a spatial code. *Nat Commun.* 8(1):1752

15. Høydal ØA, Skytøen ER, Andersson SO, Moser MB, Moser EI (2019) Object-vector coding in the medial entorhinal cortex. *Nature*. 568(7752):400-404.
16. Vogt BA, Miller MW (1983) Cortical connections between rat cingulate cortex and visual, motor, and postsubicular cortices. *J Comp Neurol*. 216(2):192-210.
17. Van Groen T, Wyss JM (1990) Connections of the retrosplenial granular a cortex in the rat. *J Comp Neurol*. 300(4):593-606.
18. Burwell RD, Amaral DG (1998) Cortical afferents of the perirhinal, postrhinal, and entorhinal cortices of the rat. *J Comp Neurol*. 398(2):179-205.
19. Van Groen T, Wyss JM (2003) Connections of the retrosplenial granular b cortex in the rat. *J Comp Neurol*. 463(3):249-63.
20. Agster KL, Burwell RD (2009) Cortical efferents of the perirhinal, postrhinal, and entorhinal cortices of the rat. *Hippocampus*. 19(12):1159-86.
21. Czajkowski R, Sugar J, Zhang SJ, Couey JJ, Ye J, Witter MP (2013) Superficially projecting principal neurons in layer V of medial entorhinal cortex in the rat receive excitatory retrosplenial input. *J Neurosci*. 33(40):15779-92.
22. Olsen GM, Witter MP (2016) Posterior parietal cortex of the rat: Architectural delineation and thalamic differentiation. *J Comp Neurol*. 524(18):3774-3809.
23. Olsen GM, Ohara S, Iijima T, Witter MP (2017) Parahippocampal and retrosplenial connections of rat posterior parietal cortex. *Hippocampus*. 27(4):335-358.
24. Yamawaki N, Corcoran KA, Guedea AL, Shepherd GMG, Radulovic J (2019) Differential Contributions of Glutamatergic Hippocampal→Retrosplenial Cortical Projections to the Formation and Persistence of Context Memories. *Cereb Cortex*. 29(6):2728-2736.
25. McNaughton BL, Mizumori SJ, Barnes CA, Leonard BJ, Marquis M, Green EJ. (1994) Cortical representation of motion during unrestrained spatial navigation in the rat. *Cereb Cortex*. 4(1):27-39.
26. Cho J, Sharp PE (2001) Head direction, place, and movement correlates for cells in the rat retrosplenial cortex. *Behav. Neurosci*. 115(1):3-25.
27. Whitlock JR, Pfuhl G, Dagslott N, Moser MB, Moser EI (2012) Functional split between parietal and entorhinal cortices in the rat. *Neuron*. 73(4):789-802.
28. Alexander AS, Nitz DA (2015) Retrosplenial cortex maps the conjunction of internal and external spaces. *Nat Neurosci*. 18(8):1143-51.
29. Alexander AS, Nitz DA (2017) Spatially Periodic Activation Patterns of Retrosplenial Cortex Encode Route Sub-spaces and Distance Traveled. *Curr Biol*. 27(11):1551-1560.

30. Mimica B, Dunn BA, Tombaz T, Bojja VPTNCS, Whitlock JR (2018) Efficient cortical coding of 3D posture in freely behaving rats. *Science*. 362(6414):584-589.
31. Wilber AA, Clark BJ, Forster TC, Tatsuno M, McNaughton BL. (2014) Interaction of egocentric and world-centered reference frames in the rat posterior parietal cortex. *J Neurosci*. 34(16):5431-46.
32. Yang FC, Jacobson TK, Burwell RD (2017) Single neuron activity and theta modulation in the posterior parietal cortex in a visuospatial attention task. *Hippocampus*. 27(3):263-273.
33. Miller AMP, Mau W, Smith DM (2019) Retrosplenial Cortical Representations of Space and Future Goal Locations Develop with Learning. *Curr Biol*. 29(12):2083-2090.
34. Reep RL, Chandler HC, King V, Corwin JV (1994) Rat posterior parietal cortex: topography of corticocortical and thalamic connections. *Exp Brain Res*. 100(1):67-84.
35. Nitz D (2009) Parietal cortex, navigation, and the construction of arbitrary reference frames for spatial information. *Neurobiol Learn Mem*. 2009 Feb;91(2):179-85.
36. Yamawaki N, Radulovic J, Shepherd GM (2016) A Corticocortical Circuit Directly Links Retrosplenial Cortex to M2 in the Mouse. *J Neurosci*. 36(36):9365-74.
37. Gu X, Staines WA, Fortier WP (1999) Quantitative analyses of neurons projecting to primary motor cortex zones controlling limb movements in the rat. *Brain Res*. 835:175-187.
38. Ueno M, Nakamura Y, Li J, Gu Z, Niehaus J, Maezawa M, Crone SA, Goulding M, Baccei ML, Yoshida Y (2018) Corticospinal Circuits from the Sensory and Motor Cortices Differentially Regulate Skilled Movements through Distinct Spinal Interneurons. *Cell Rep*. 23(5):1286-1300.
39. Barthas F, Kwan AC (2017) Secondary Motor Cortex: Where 'Sensory' Meets 'Motor' in the Rodent Frontal Cortex. *Trends Neurosci*. 40(3):181-193.
40. Erich JC, Bialek M, Brody CD (2011) A cortical substrate for memory-guided orienting in the rat. *Neuron*. 72(2):330-43.
41. Sul JH, Jo S, Lee D, Jung MW (2011) Role of rodent secondary motor cortex in value-based action selection. *Nat Neurosci*. 14(9):1202-8.
42. Murakami M, Vicente MI, Costa GM, Mainen ZF (2014) Neural antecedents of self-initiated actions in secondary motor cortex. *Nat Neurosci*. 17(11):1574-82.
43. Li N, Daie K, Svoboda K, Druckmann S (2015) Robust neuronal dynamics in premotor cortex during motor planning. *Nature*. 532(7600):459-64.
44. Hanks TD, Kopec CD, Brunton BW, Duan CA, Erlich JC, Brody CD (2015) Distinct relationships of parietal and prefrontal cortices to evidence accumulation. *Nature*. 520(7546):220-3.

45. Peters AJ, Chen SX, Komiyama T (2014) Emergence of reproducible spatiotemporal activity during motor learning. *Nature*. 510(7504):263-7.
46. Siniscalchi MJ, Phoumthipphavong V, Ali F, Lozano M, Kwan AC (2016) Fast and slow transitions in frontal ensemble activity during flexible sensorimotor behavior. *Nat Neurosci*. 19(9):1234-42.
47. Chen TW, Li N, Daie K, Svoboda K (2017) A Map of Anticipatory Activity in Mouse Motor Cortex. *Neuron*. 94(4):866-879.
48. Jung MW, Qin Y, McNaughton BL, Barnes CA (1998) Firing characteristics of deep layer neurons in prefrontal cortex in rats performing spatial working memory tasks. *Cereb Cortex*. 8(5):437-50.
49. Pratt WE, Mizumori SJ (2001) Neurons in rat medial prefrontal cortex show anticipatory rate changes to predictable differential rewards in a spatial memory task. *Behav Brain Res*. 123(2):165-83
50. Jones MW, Wilson MA (2005) Theta rhythms coordinate hippocampal-prefrontal interactions in a spatial memory task. *PLoS Biol*. 3(12):e402.
51. Euston DR, McNaughton BL (2006) Apparent encoding of sequential context in rat medial prefrontal cortex is accounted for by behavioral variability. *J Neurosci*. 26(51):13143-55.
52. Narayanan NS, Laubach M (2006) Top-down control of motor cortex ensembles by dorsomedial prefrontal cortex. *Neuron*. 2006 Dec 7;52(5):921-31.
53. Kargo WJ, Szatmary B, Nitz DA (2007) Adaptation of prefrontal cortical firing patterns and their fidelity to changes in action-reward contingencies. *J Neurosci*. 2007 Mar 28;27(13):3548-59.
54. Sul JH, Kim H, Huh N, Lee D, Jung MW (2010) Distinct roles of rodent orbitofrontal and medial prefrontal cortex in decision making. *Neuron*. 66(3):449-60.
55. Durstewitz D, Vittoz NM, Floresco SB, Seamans JK (2010) Abrupt transitions between prefrontal neural ensemble states accompany behavioral transitions during rule learning. *Neuron*. 2010 May 13;66(3):438-48.
56. Cowen SL, Davis GA, Nitz DA (2012) Anterior cingulate neurons in the rat map anticipated effort and reward to their associated action sequences. *J Neurophysiol*. 2012 May;107(9):2393-407.
57. Horst NK, Laubach M (2012) Working with memory: evidence for a role for the medial prefrontal cortex in performance monitoring during spatial delayed alternation. *J Neurophysiol*. 108(12):3276-88
58. Hyman JM, Whitman J, Emberly E, Woodward TS, Seamans JK (2013) Action and outcome activity state patterns in the anterior cingulate cortex. *Cereb Cortex* 23(6):1257-68.

59. Ito HT, Zhang SJ, Witter MP, Moser EI, Moser MB (2015) A prefrontal-thalamo-hippocampal circuit for goal-directed spatial navigation. *Nature*. 522(7554):50-5.
60. Powell NJ, Redish AD (2016) Representational changes of latent strategies in rat medial prefrontal cortex precede changes in behaviour. *Nat Commun*. 7:12830.
61. Malagon -Vina H, Ciochi S, Passecker J, Dorffner G, Klausberger T (2018) Fluid network dynamics in the prefrontal cortex during multiple strategy switching. *Nat Commun*. 9(1):309
62. Yu JY, Liu DF, Loback A, Grossrubatscher I, Frank LM (2018) Specific hippocampal representations are linked to generalized cortical representations in memory. *Nat Commun*. 2018 Jun 7;9(1):2209.
63. Buzsaki G, Mizuseki K (2014) The log-dynamic brain: how skewed distributions affect network operations. *Nat. Rev. Neurosci*. 15:264-78.
64. Britten KH, Newsome WT, Shadlen MN, Celebrini S, Movshon JA (1996) A relationship between behavioral choice and the visual responses of neurons in macaque MT. *Vis. Neurosci*. 13:87–100.
65. Erlich JC, Bialek M, Brody CD (2011) A cortical substrate for memory-guided orienting in the rat. *Neuron* (72)330–43.
66. Green DW, Swets JA (1966) Signal detection theory and psychophysics. Wiley Publishing.
67. Bamber D (1975) The area above the ordinal dominance graph and the area below the receiver operating characteristic graph. *J. Math. Psychol*. 12:387-415.
68. Ostlund SB, Winterbauer NE, Balleine BW (2009) Evidence of action sequence chunking in goal-directed instrumental conditioning and its dependence on the dorsomedial prefrontal cortex. *J Neurosci*. 29(25):8280-7.
69. Smith NJ, Horst NK, Liu B, Caetano MS, Laubach M (2010) Reversible Inactivation of Rat Premotor Cortex Impairs Temporal Preparation, but not Inhibitory Control, During Simple Reaction-Time Performance. *Front Integr Neurosci*. 4:124
70. Economo MN, Viswanathan S, Tasic B, Bas E, Winnubst J, Menon V, Graybiel LT, Nguyen TN, Smith KA, Yao Z, Wang L, Gerfen CR, Chandrashekar J, Zeng H, Looger LL, Svoboda K (2018) Distinct descending motor cortex pathways and their roles in movement. *Nature*. Nov;563(7729):79-84.
71. Svoboda K, Li N (2018) Neural mechanisms of movement planning: motor cortex and beyond. *Curr Opin Neurobiol*. 49:33-41.
72. Guo ZV, Inagaki HK, Daie K, Druckmann S, Gerfen CR, Svoboda K (2017) Maintenance of persistent activity in a frontal thalamocortical loop. *Nature*. 545(7653):181-186

73. Guo ZV, Li N, Huber D, Ophir E, Gutnisky D, Ting JT, Feng G, Svoboda K (2014) Flow of cortical activity underlying a tactile decision in mice. *Neuron*. 81(1):179-94.
74. Gao Z, Davis C, Thomas AM, Economo MN, Abrego AM, Svoboda K, De Zeeuw CI, Li N (2018) A cortico-cerebellar loop for motor planning. *Nature*. 563(7729):113-116.
75. Nitz DA (2012) Spaces within spaces: rat parietal cortex neurons register position across three reference frames. *Nat Neurosci*. 15(10):1365-7.
76. Chen LL, Lin LH, Green EJ, Barnes CA, McNaughton BL (1994) Head-direction cells in the rat posterior cortex. I. Anatomical distribution and behavioral modulation. *Exp Brain Res*. 101(1):8-23.
77. Jacob PY, Casali G, Spieser L, Page H, Overington D, Jeffery K (2017) An independent, landmark-dominated head-direction signal in dysgranular retrosplenial cortex. *Nat Neurosci*. 20(2):173-175.
78. Harvey CD, Coen P, Tank DW (2012) Choice-specific sequences in parietal cortex during a virtual-navigation decision task. *Nature*. 484(7392):62-8.
79. Li N, Chen TW, Guo ZV, Gerfen CR, Svoboda K (2015) A motor cortex circuit for motor planning and movement. *Nature*. 519(7541):51-6.
80. Inagaki HK, Inagaki M, Romani S, Svoboda K (2018) Low-Dimensional and Monotonic Preparatory Activity in Mouse Anterior Lateral Motor Cortex. *J Neurosci*. 38(17):4163-4185.
81. Kraus, BJ (2013) *Nanconv.m*.



**Figure 1: M2 robustly encodes action across space.** **A)** Schematic of triple ‘T’ maze and route-running task. Animals made runs along each of up to eight partially overlapping internal routes (solid yellow lines) on the 160cm x 125cm track apparatus, leading from a start site (green circle) to any of four goal sites (red ‘x’). Numbers indicate the index of the turn in the progress of an internal route. From each goal site, the animal returned to the start via either of two return paths (dashed yellow lines). For some task setups, only the routes leading to the top four goal locations were used. **B)** Behavioral tracking of identified clean runs. Shown are all clean runs from one recording session in the visit-all-8 reward setup. Each color shows a separate route. Routes are minimally translated and stretched for visualization purposes. **C)** Electrode placement and recording ranges in M2 (seven rats). Lines track dorsal-ventral recording depths across recordings. **D)** Example neuron positional firing rate maps. Shown are the firing rates color-mapped as a function of route and track position. As in Figure 1B, routes are minimally translated and stretched from the actual track location to separate each map for visualization purposes. Under each rate map is the choice probability (CP) for left and right actions, pooled across all locations. **E)** Linearized perievent firing rate maps. Mean (line) and s.d. (shaded) of the individual linear firing rate values surrounding each of left and right turns, shown in blue and red, respectively, for the corresponding neurons in **D**. **F)** Percentage of M2 neurons significantly discriminating left/right actions for the first internal turn versus all turn locations combined. **G)** Cumulative density functions (CDFs) of the entire M2 populations’ all-turn-locations-combined left/right turn CPs (orange), mean action CPs of individual locations (maroon), and shuffled action CPs (blue). **H)** CDFs of the entire M2 populations’ action CPs of individual locations. Each color is a different spatial location on the maze. **I)** Probability density function of the action CPs for all turns pooled across locations.

**Figure 2: Temporal dynamics of M2 action encoding.** **A)** Choice probabilities of individual neurons (rows) across space (columns) in the perievent window surrounding the first left/right turn on the internal routes (Figure 1A, labeled 1). Neurons sorted by the location of their max choice probability. Black line indicates turn apex. **B)** M2 action encoding strength as a function of time. Shown are percentages of neurons encoding the action at each spatial distance from the turn apex. Blue trace is the percentage above a 95% criteria of a bootstrapped distribution. Dotted black line is the expected chance value. Orange and green traces are percentages of neurons at the chosen thresholds of 66% and 90%, respectively. **C)** Extent of decoding period. Number of spatial bins within 10% of the maximum choice probability for each individual neuron during the time course analysis. Each dot represents one neuron.

**Figure 3: Spatial context discrimination in M2.** Color labels are consistent across all of Figure 3. **A)** Cumulative density functions (CDFs) for the entire M2 populations' CPs under different spatial conditions. Also included for comparison are CDFs of action CPs from individual locations and shuffled action CPs as in Figure 1G. Separate graphs are the mean pairwise CPs (left), minimum pairwise CPs (middle), and maximum pairwise CPs (right). **B)** Percentages of M2 neurons with mean pairwise CPs above our thresholds for each condition. **C)** Choice probability correlation table. Listed are the Pearson R correlation coefficients for the mean pairwise CPs of each pair of conditions graphed in **A**. **D)** Example neuron positional firing rate map color-mapped as a function of route and track position. The yellow box highlights an example of route encoding, while the purple boxes highlight location encoding. As in Figure 1B, routes are minimally translated and stretched from the actual track location to separate each map for visualization purposes. **E)** CPs from each of the three plots in **A** for the corresponding example neuron shown in **D**. **F)** Linear perievent rate maps for the highlighted examples in **D**. Examples of route discrimination from the yellow box in **D** (top) and location discrimination from the purple boxes in **D** (bottom). Only one action (right turns) shown since CPs controlled for action and would compare each action condition separately.

**Figure 4: Choice context does not effect action encoding discrimination. A)** Cumulative density functions (CDFs) for the entire M2 populations' action CPs under choice (gold) and forced (purple) turn contexts. Also included for comparison are CDFs of action CPs from individual locations (orange) and shuffled action CPs (blue). **B)** CDF of mean pairwise CPs of choice context (maroon) with comparison CDFs of individual location action CPs (orange) and shuffled action CPs (blue). **C)** Threshold values of choice context as compared to the spatial contexts. **D)** Example neuron positional firing rate map highlighting encoding of choice context. Shown are the firing rates color-mapped as a function of route and track position. As in Figure 1B, routes are minimally translated and stretched from the actual track location to separate each map for visualization purposes. **E)** CPs from each of the three plots in Figure 3A for the example neuron shown above. **F)** Linear perievent rate maps. Perievent plots showing the mean firing rates for the action values (top) and the choice contexts (bottom) of the example neuron shown above. All comparisons for CPs were done on data being presented in the same plot.

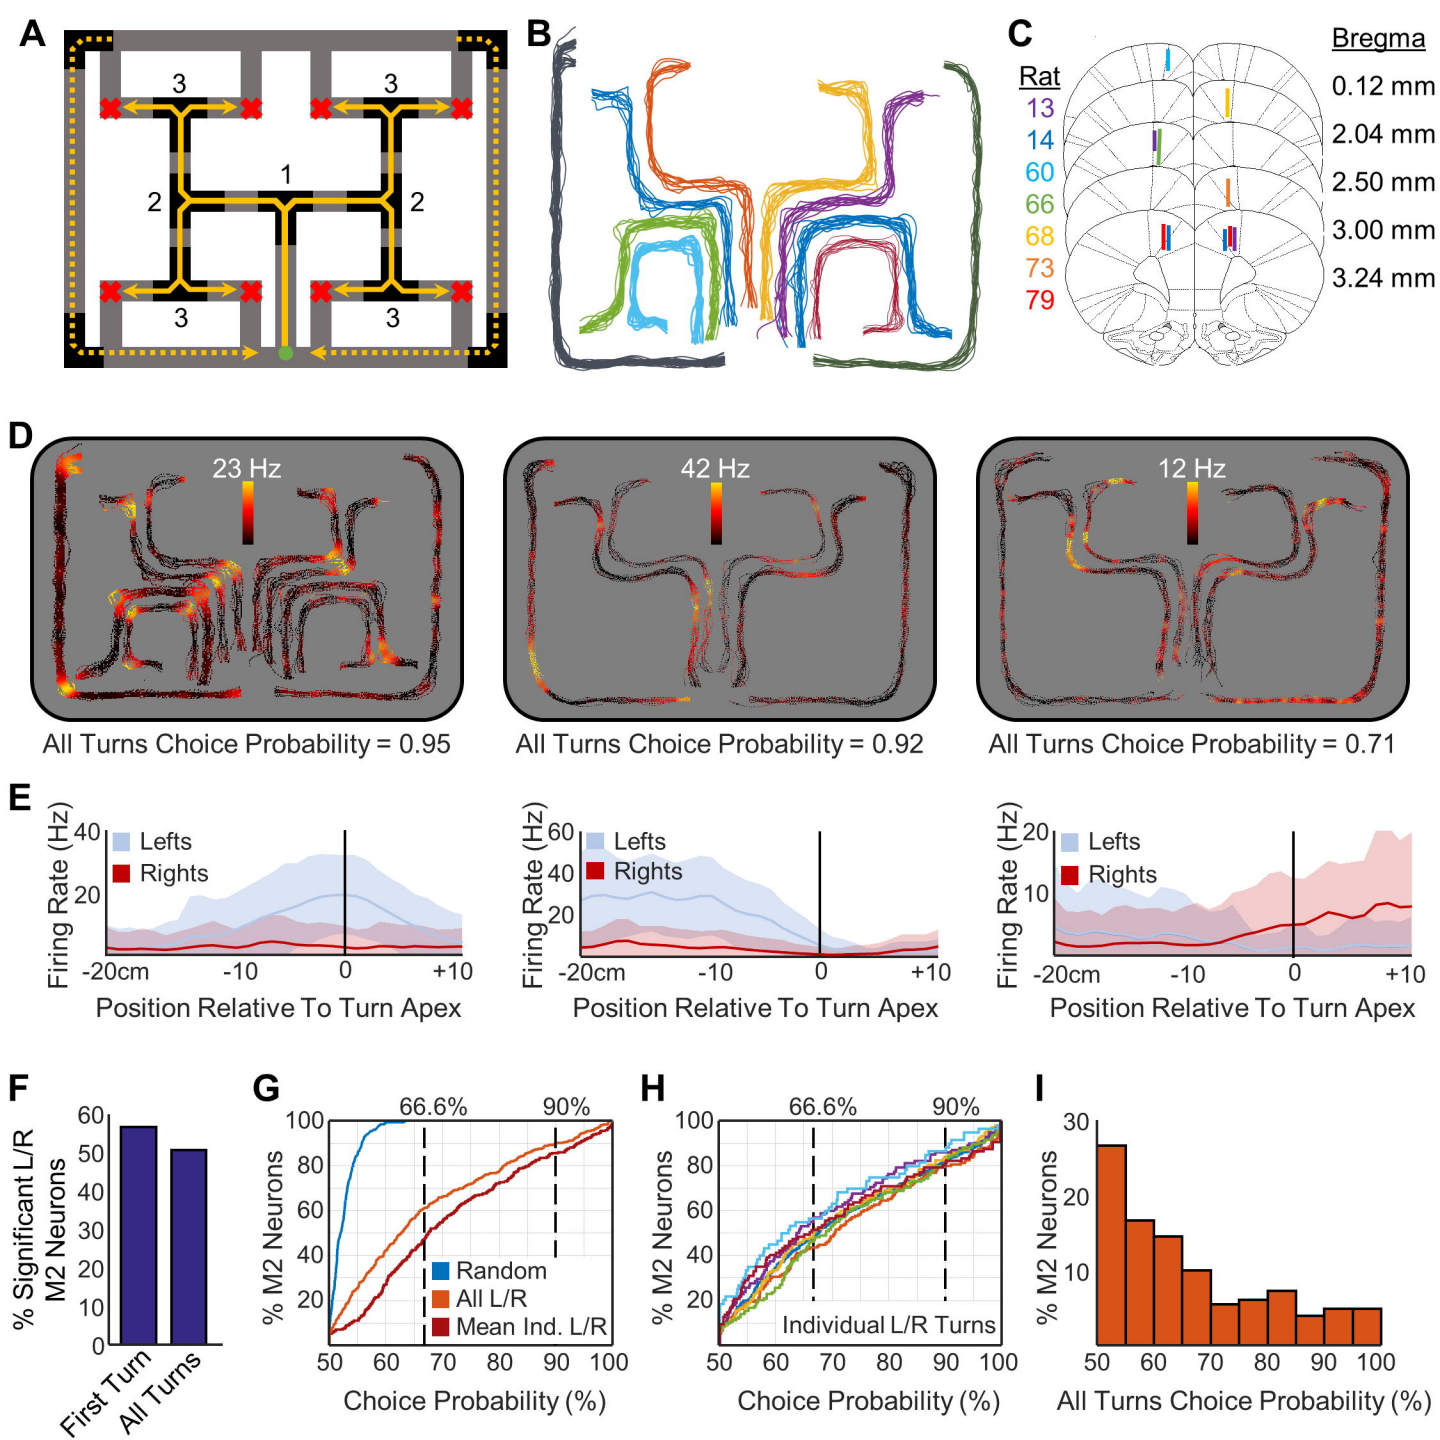

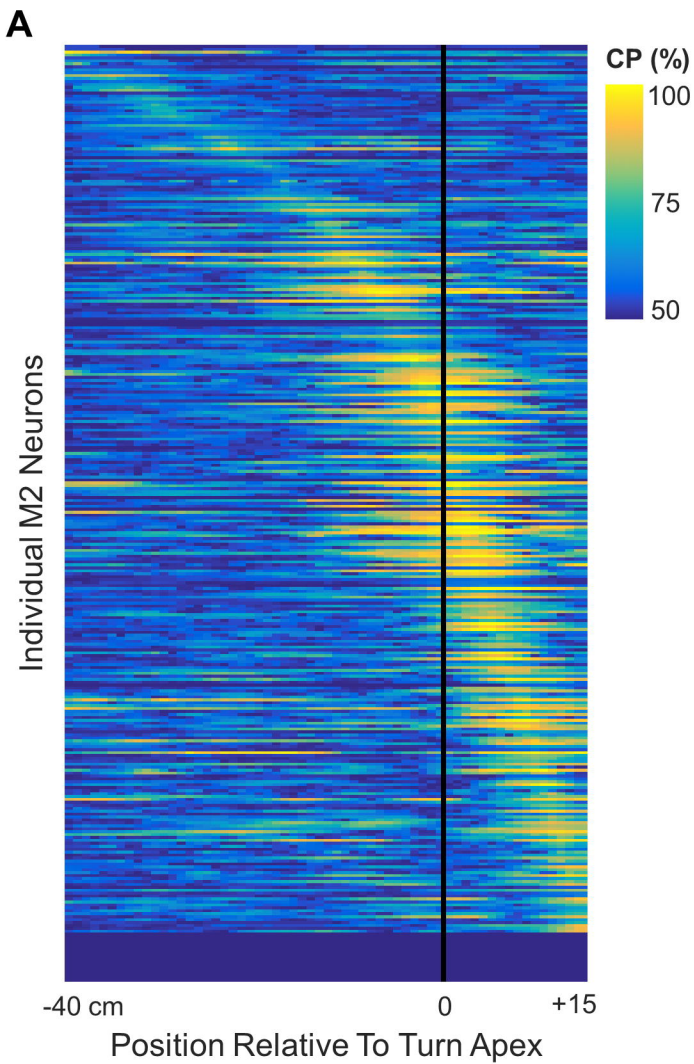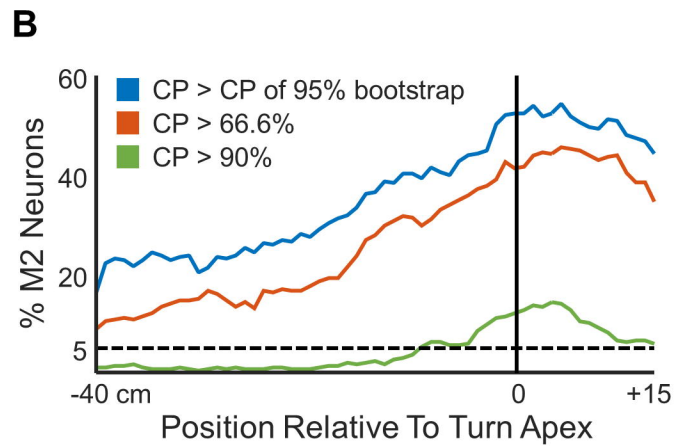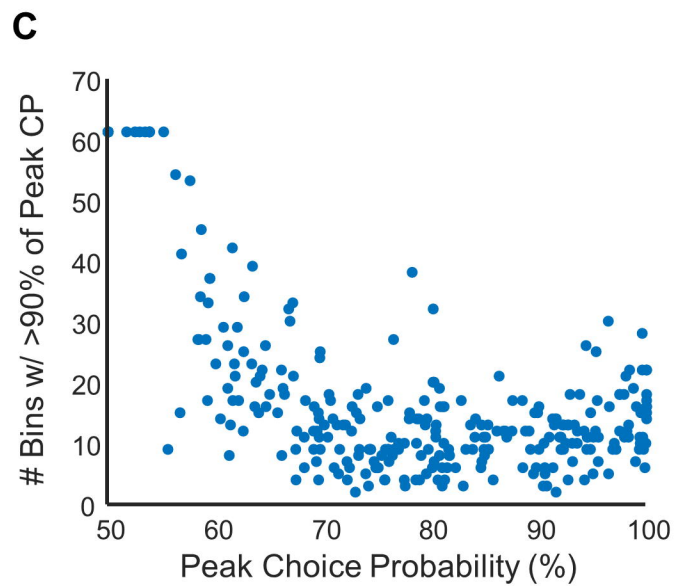

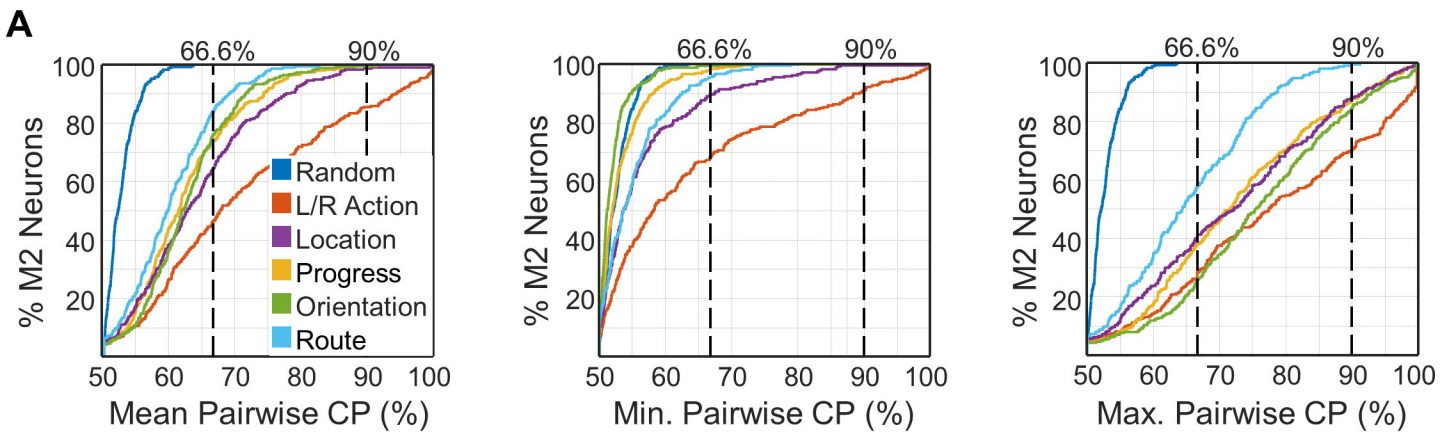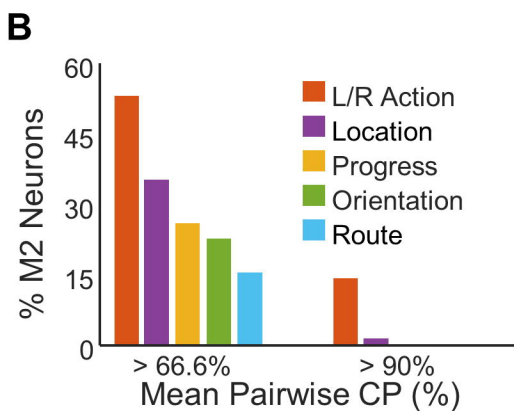

**C** Choice Probability Correlations

|             | All L/R | Progress | Location | Orientation | Route |
|-------------|---------|----------|----------|-------------|-------|
| All L/R     | 1       |          |          |             |       |
| Progress    | 0.47    | 1        |          |             |       |
| Location    | 0.40    | 0.43     | 1        |             |       |
| Orientation | 0.31    | 0.79     | 0.49     | 1           |       |
| Route       | 0.49    | 0.23     | 0.34     | 0.29        | 1     |

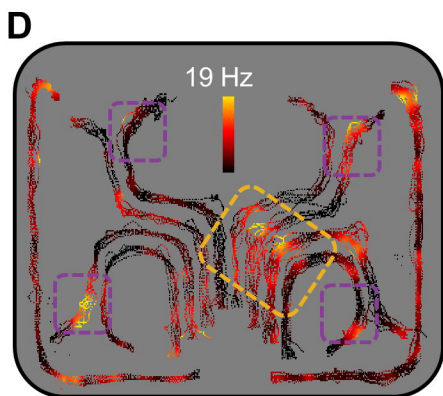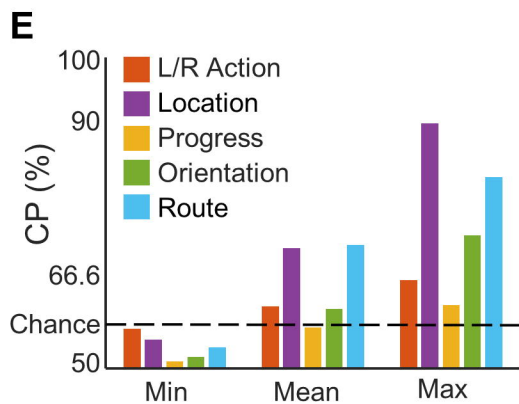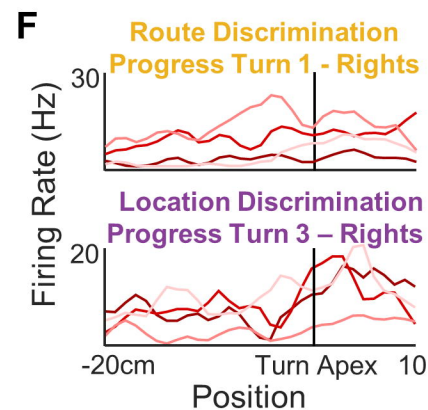

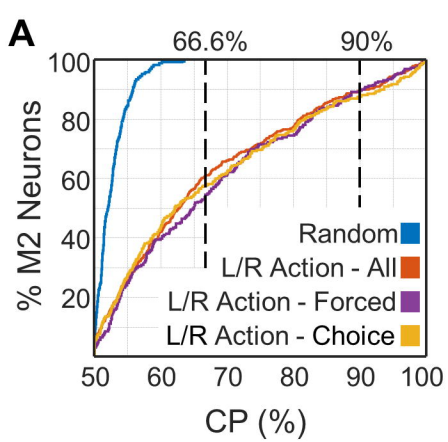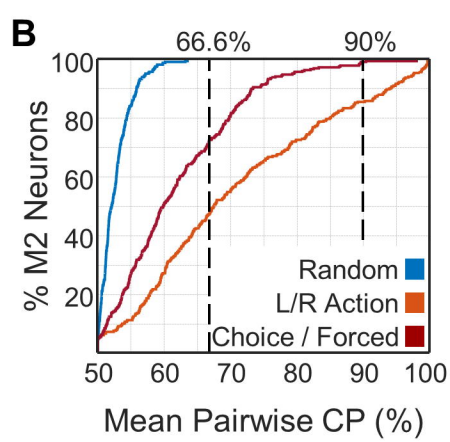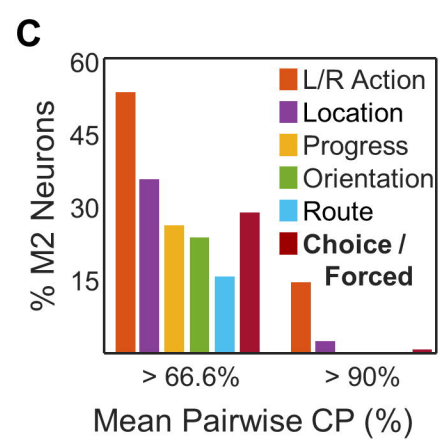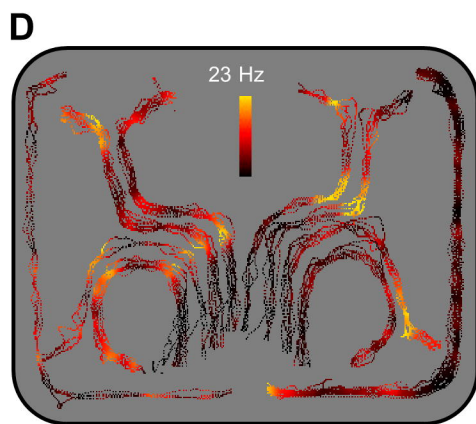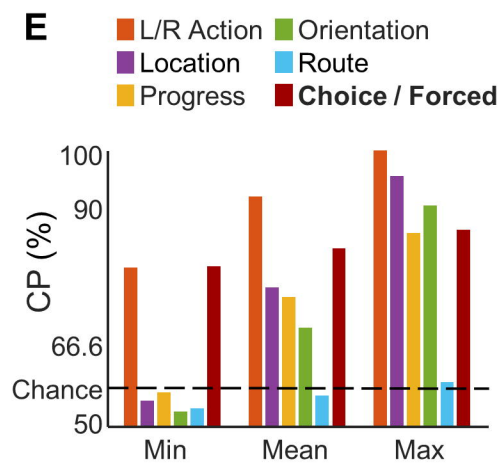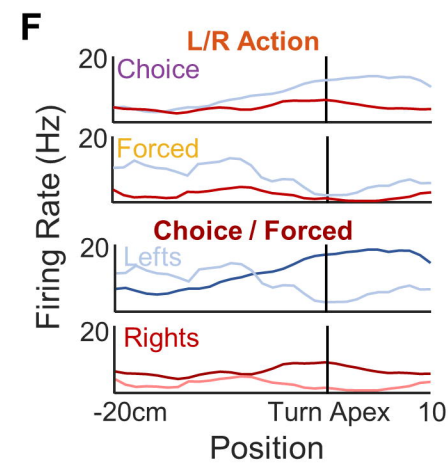

| Rat | L Hemisphere | R Hemisphere |
|-----|--------------|--------------|
| 13  | 2            | 19           |
| 14  | 23           | 12           |
| 60  | 8            | -            |
| 66  | 32           | -            |
| 68  | -            | 90           |
| 73  | -            | 84           |
| 79  | 8            | 25           |

**Supplemental Table 1: Neuron counts.** Listed in each row is the identifier index and neuron counts by hemisphere for each rat in the study.



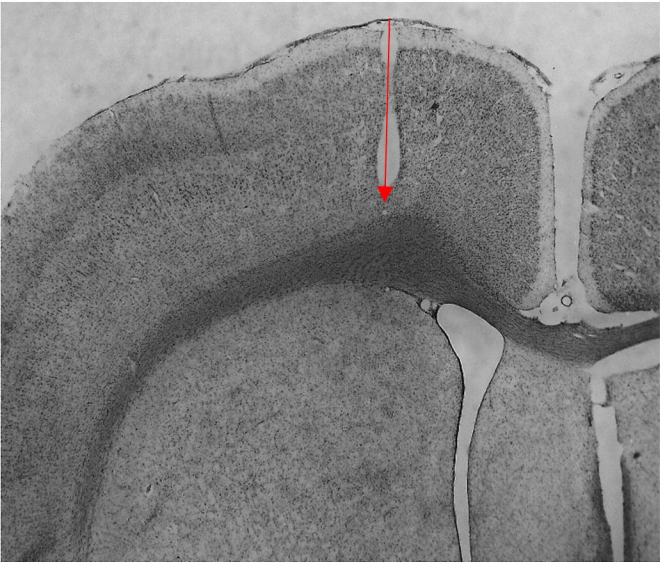

Rat 60

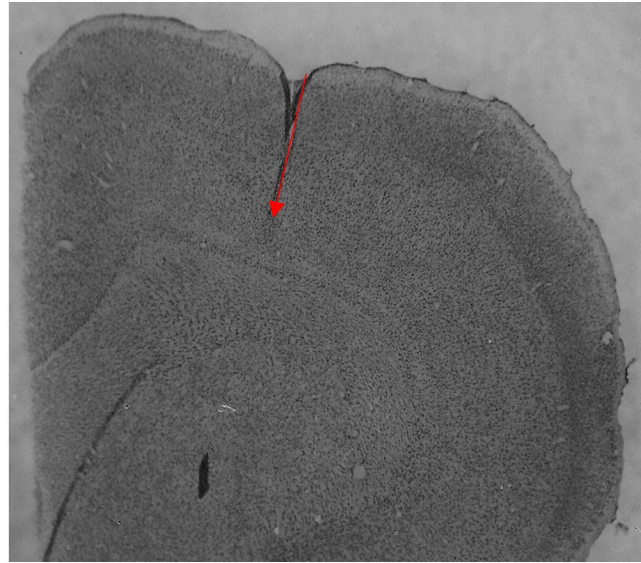

Rat 13 (R)

**Supplemental Figure 1: Histology.** Recordings of M2 neurons (N = 303) were obtained from nine bundles in seven animals. Numbers of total recorded neurons are included in Supplemental Table 1. Example histology photos. Red arrows depict tracks left by the bundles and their approximate endpoints.

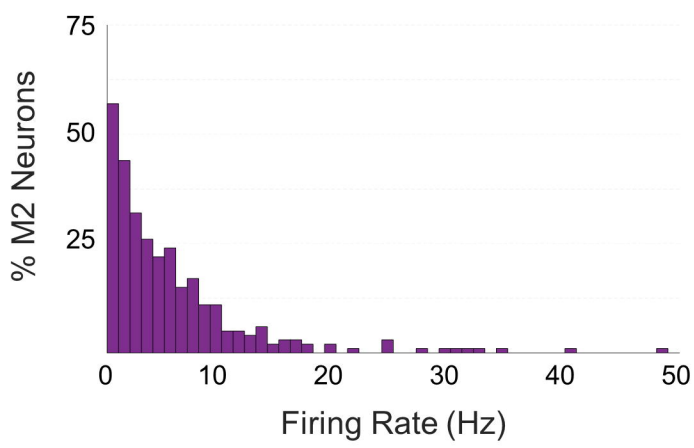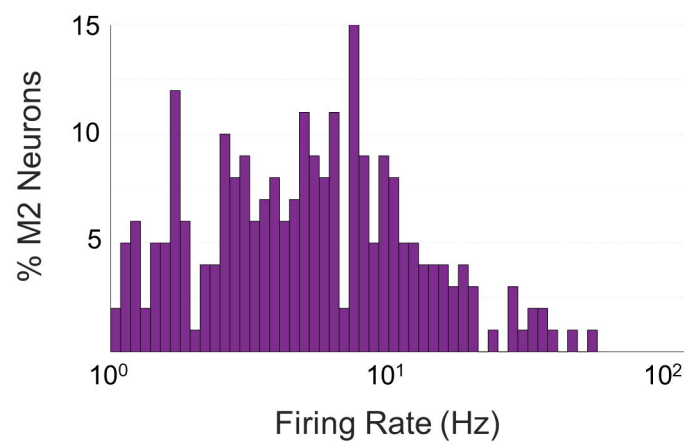

**Supplemental Figure 2: Firing rate distributions.** Mean firing rate histograms for the 303 recorded M2 neurons in both linear (left) and log-linear scales (right).
